# Supplementary material for: Bis(subphthalocyanine)–azaBODIPY triad for ultrafast photochemical processes
Source: Royal Society of Chemistry journal article supplement (doi:10.1039/c4cp02707h), 2014-07-18
Supplement: c4cp02707h1.pdf [file c4cp02707h1.pdf]

## Electronic Supplementary Information

### **Bis(subphthalocyanine)-azaBODIPY triad for ultrafast photochemical processes**

**Habtom B. Gobeze, Venugopal Bandi, Francis D'Souza\***

*Department of Chemistry, University of North Texas, 1155 Union Circle,  
#305070, Denton, TX 76203-5017, USA*

*E-mail: Francis.DSouza@unt.edu*

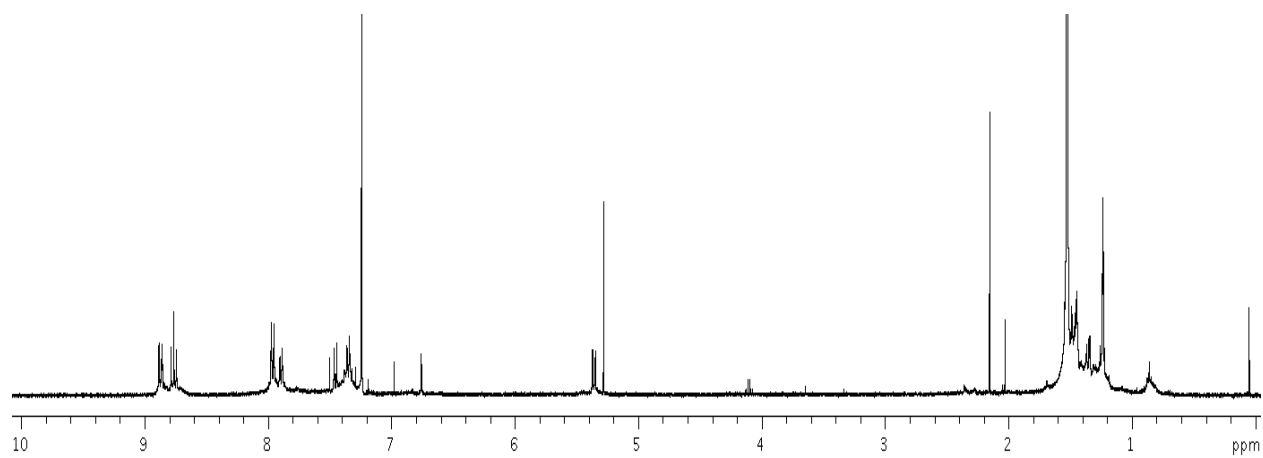

**Fig. S1.**  $^1\text{H}$ NMR spectra of compound **1** in  $\text{CDCl}_3$ .

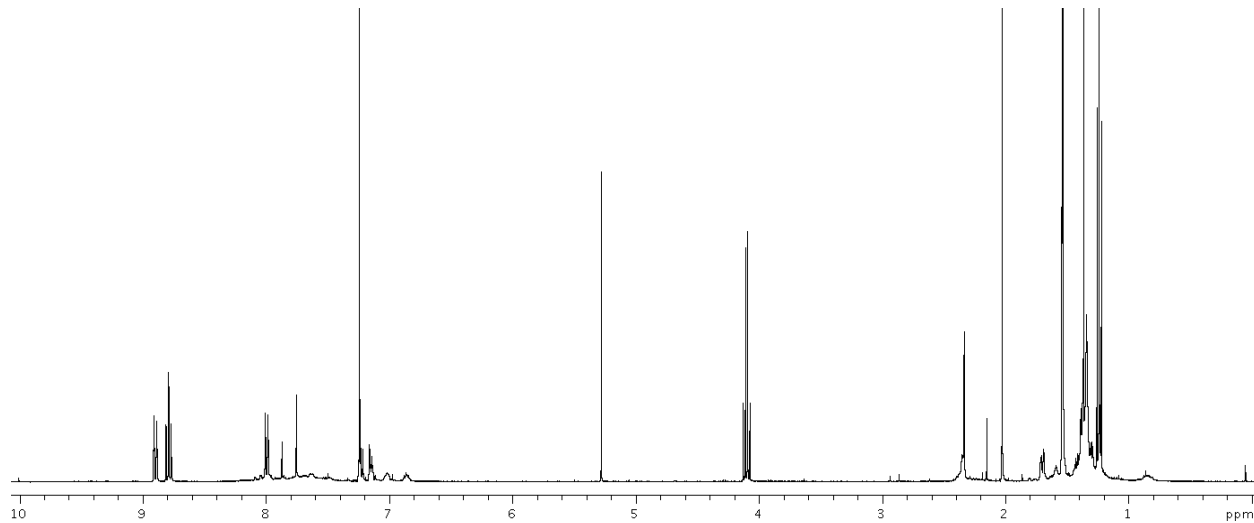

**Fig. S2.**  $^1\text{H}$ NMR spectrum of compound **1a** in  $\text{CDCl}_3$ .

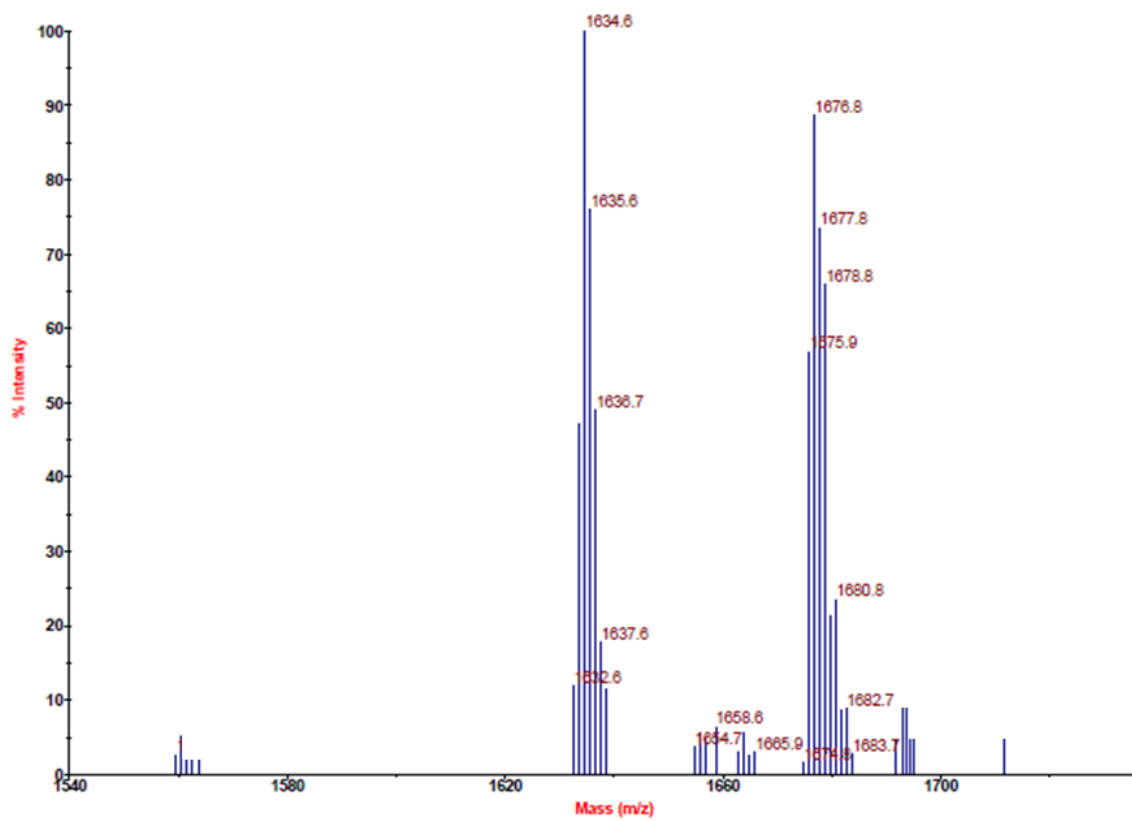

Fig. S3. Mass spectrum of compound 1.

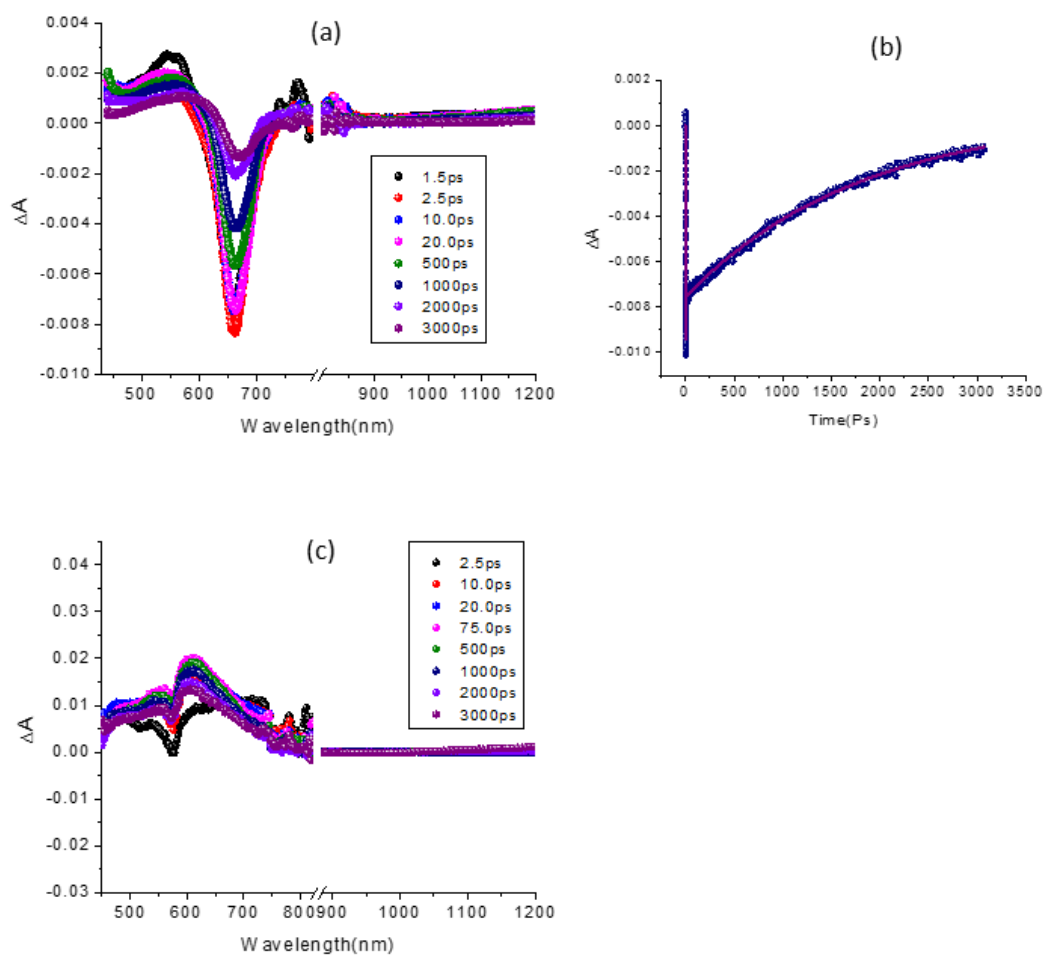

**Fig. S4.** Femtosecond transient absorption spectra of (a) azaBODIPY and (c) SubPc in benzonitrile. The samples were excited with 400 nm femtosecond (pulse width = 100 fs) laser pulses. (b) Time profile of the 660 nm band of azaBODIPY.
